# Supplementary material for: Quantification of licit and illicit drugs on typical police station work surfaces using LC-MS/MS
Source: Royal Society of Chemistry journal article supplement (doi:10.1039/c6ay02668k), 2016-11-14
Supplement: c6ay02668k1.pdf [file c6ay02668k1.pdf]

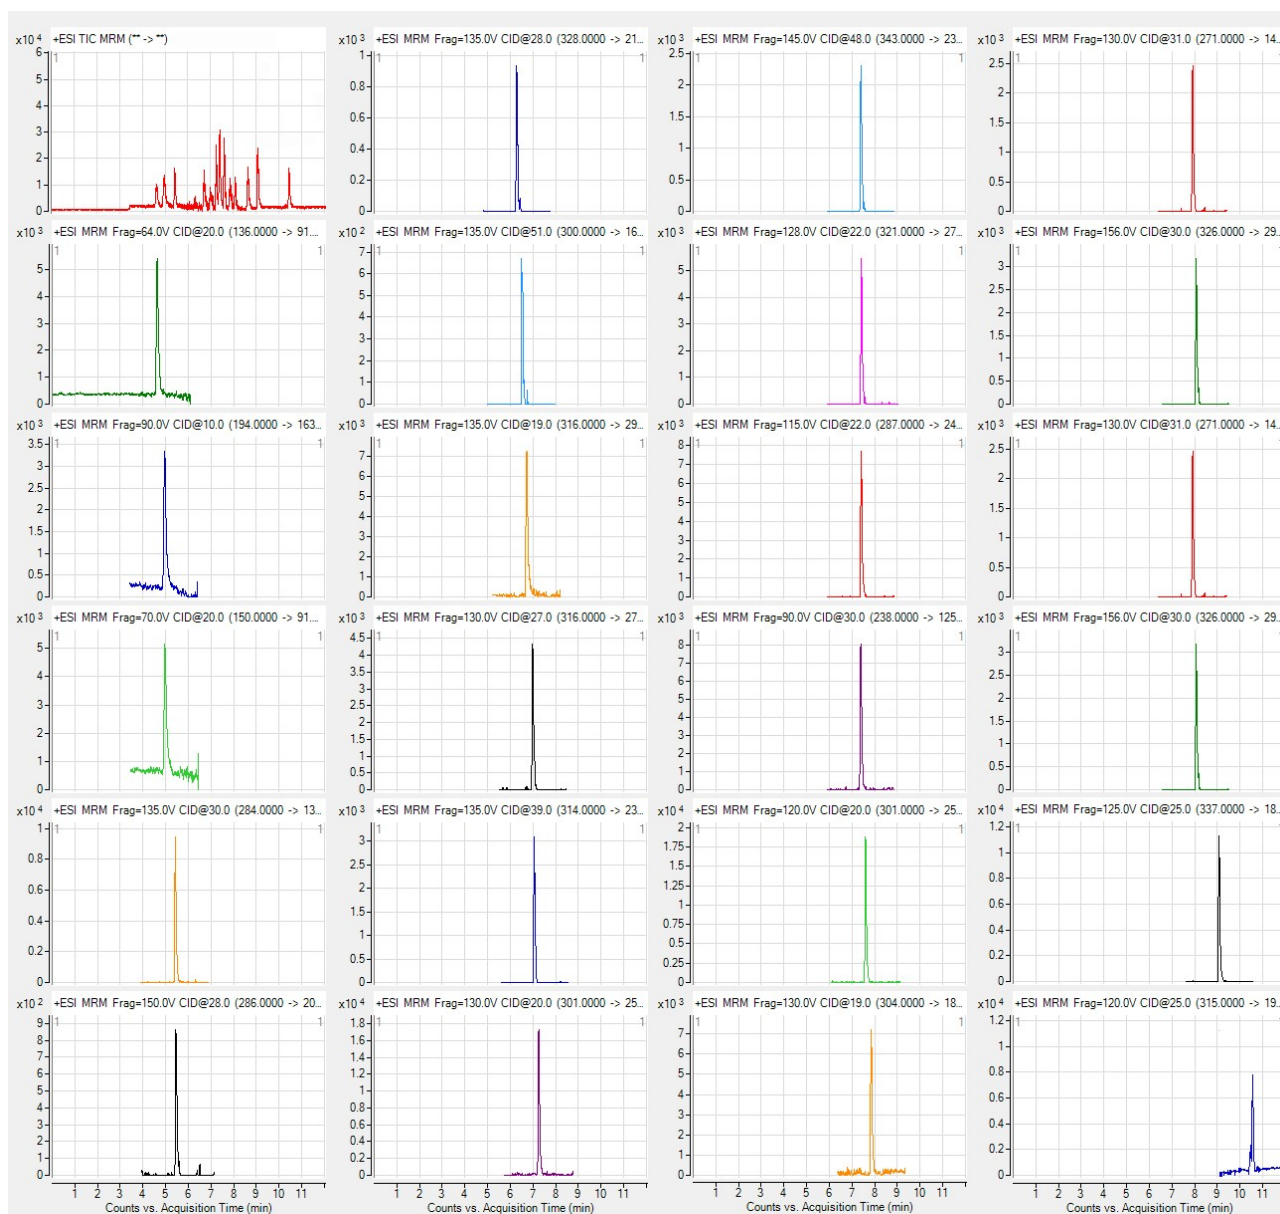

TIC for all 23 analytes and individual MRMs for each analyte for 3 ng/mL standard on 2.6  $\mu\text{m}$  HPH column
